# Supplementary material
Source: PubMed Central journal article supplement (PMC3260739)

Feb24-2018 15:28  
user Stuart Caldwell  
SC-26.  
PROTON.GLA CDCl3 /u stuartc 56

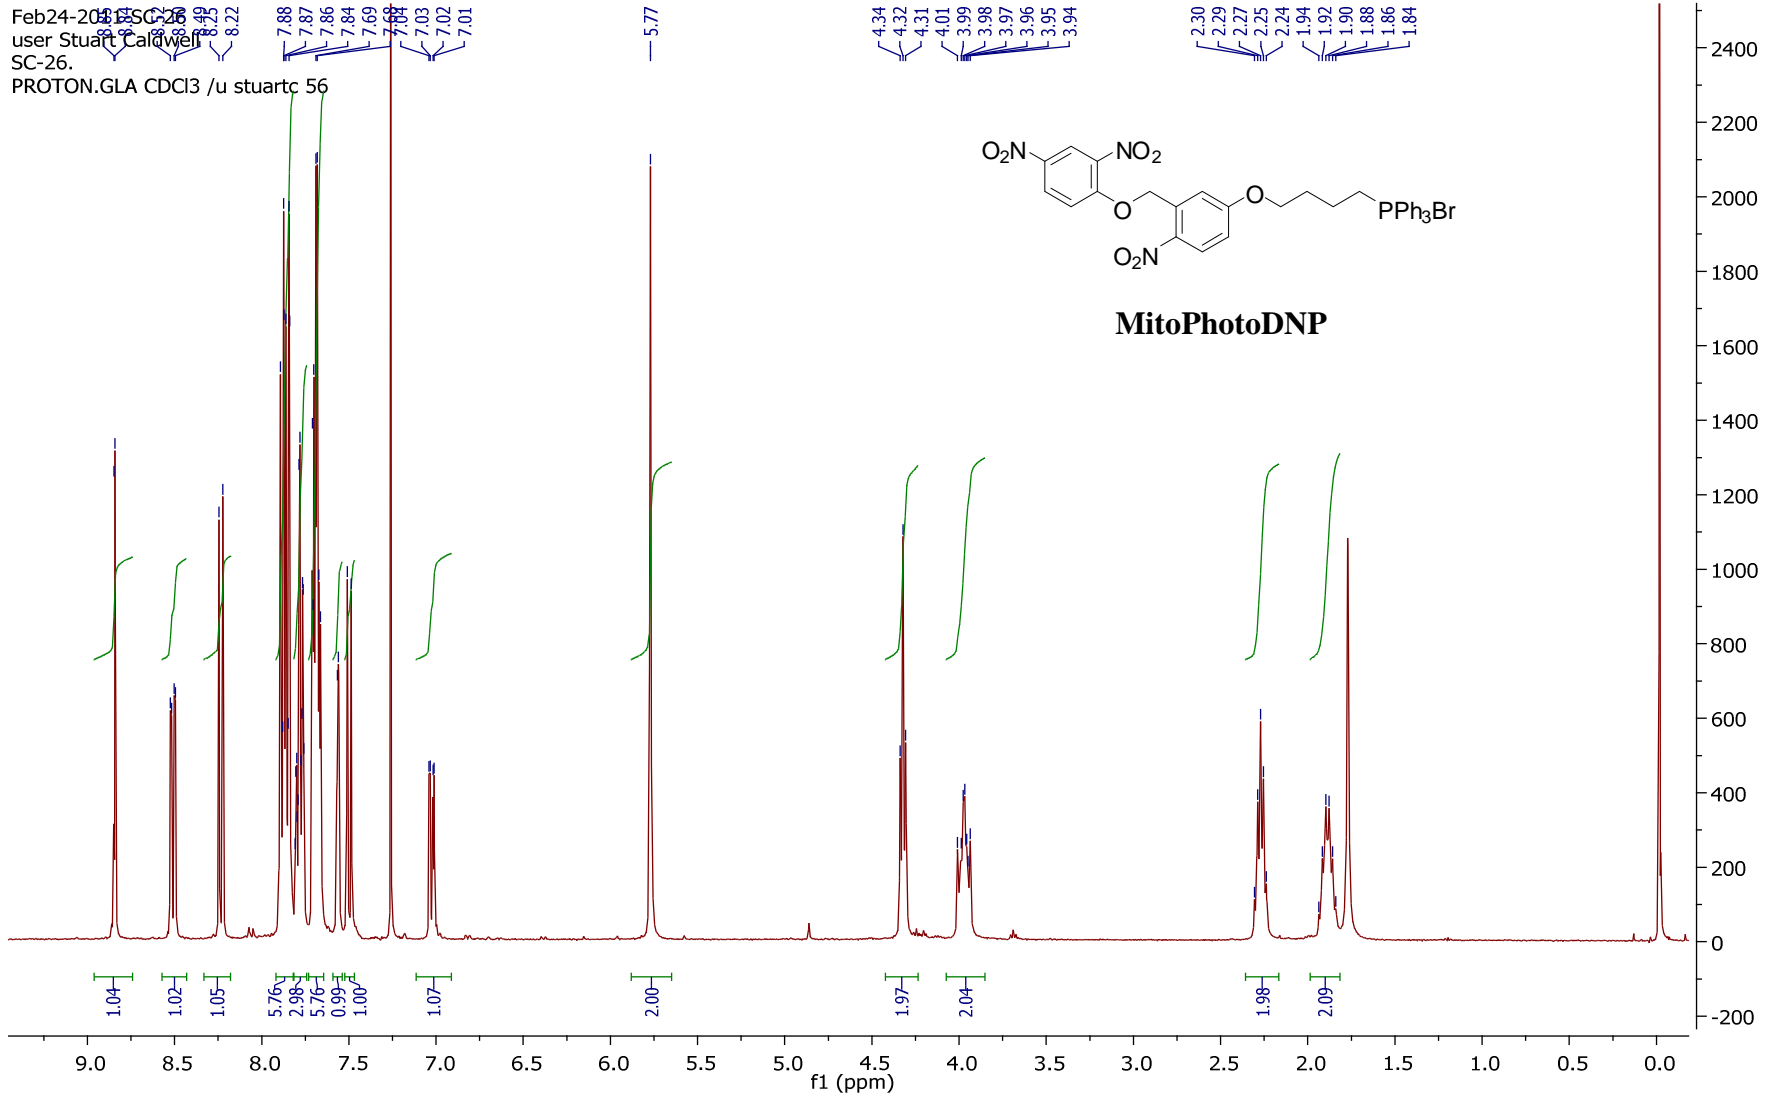

Feb24-2018-SC-26  
user Stuart Caldwell  
SC-26.  
C13CPD1024.GLA CDCl3 /u stuartc 47

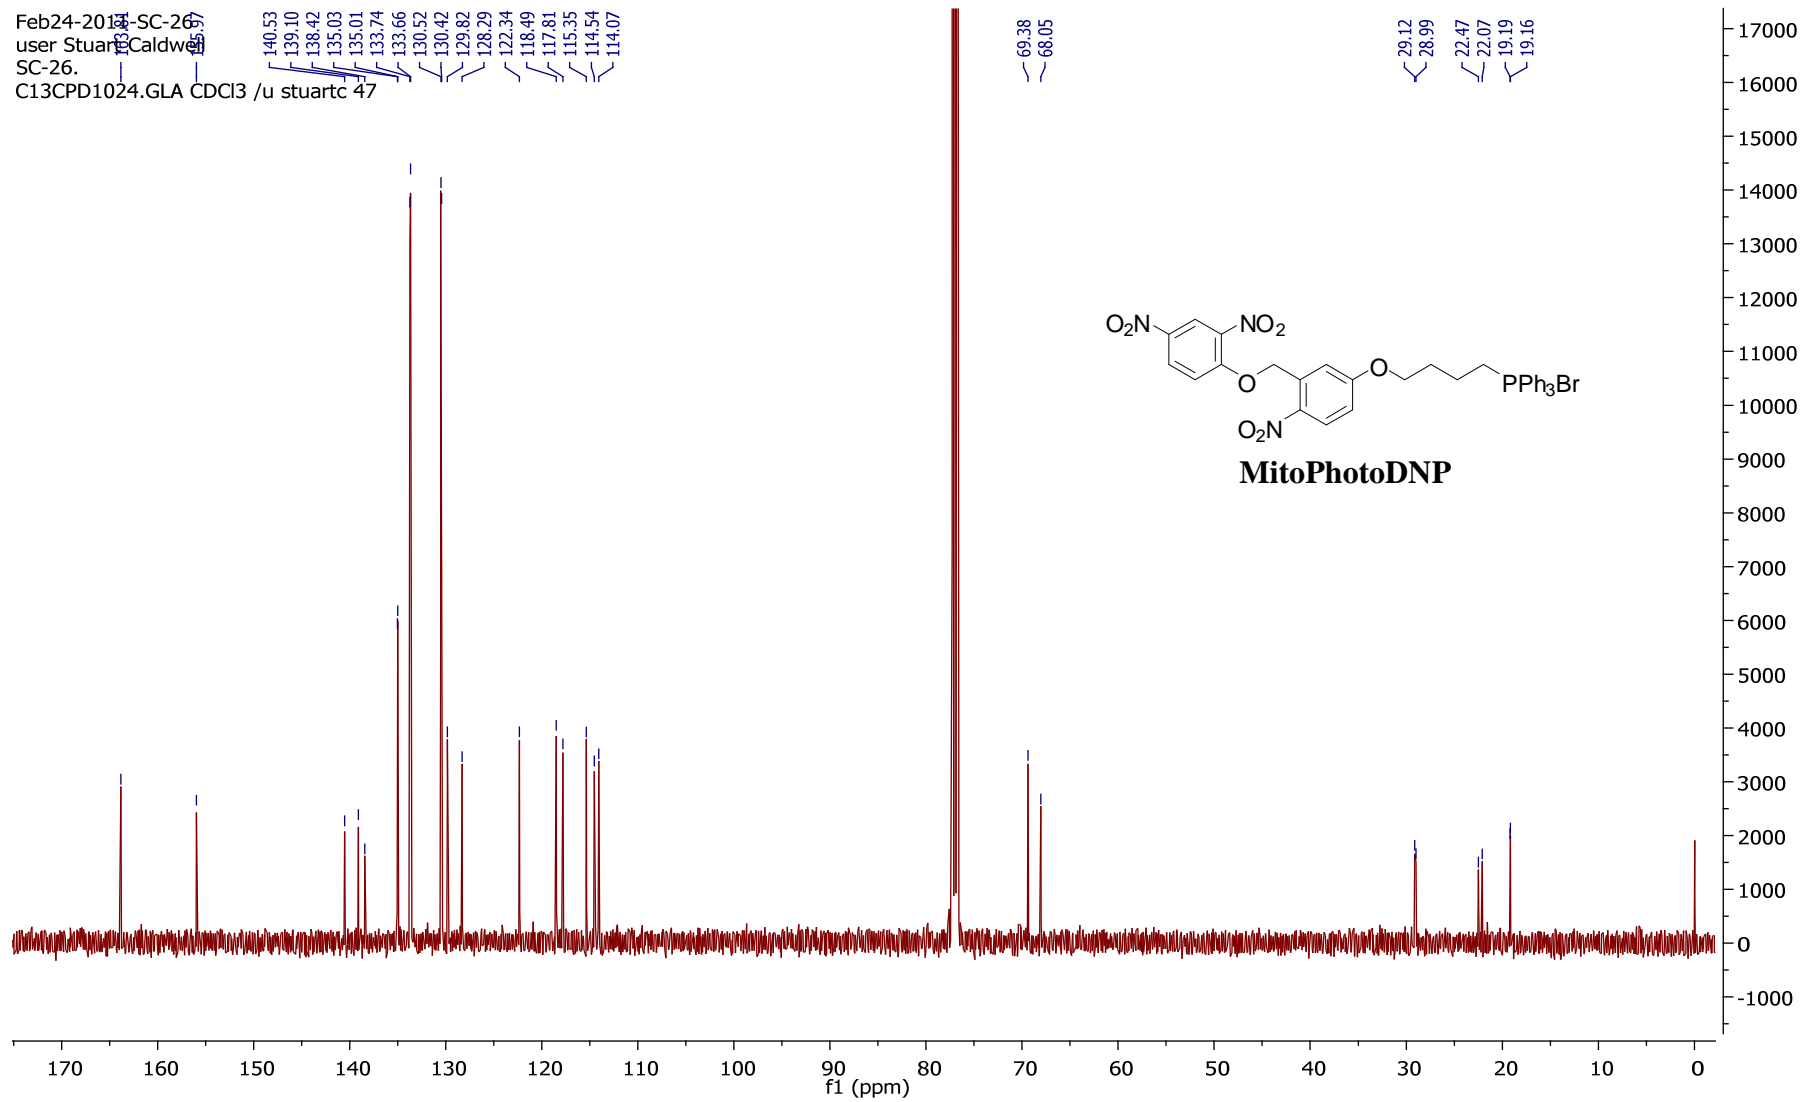

Feb09-2011-SC-12  
user Stuart Caldwell  
SC-12.  
PROTON.GLA CDCl3 /u stuartc 1

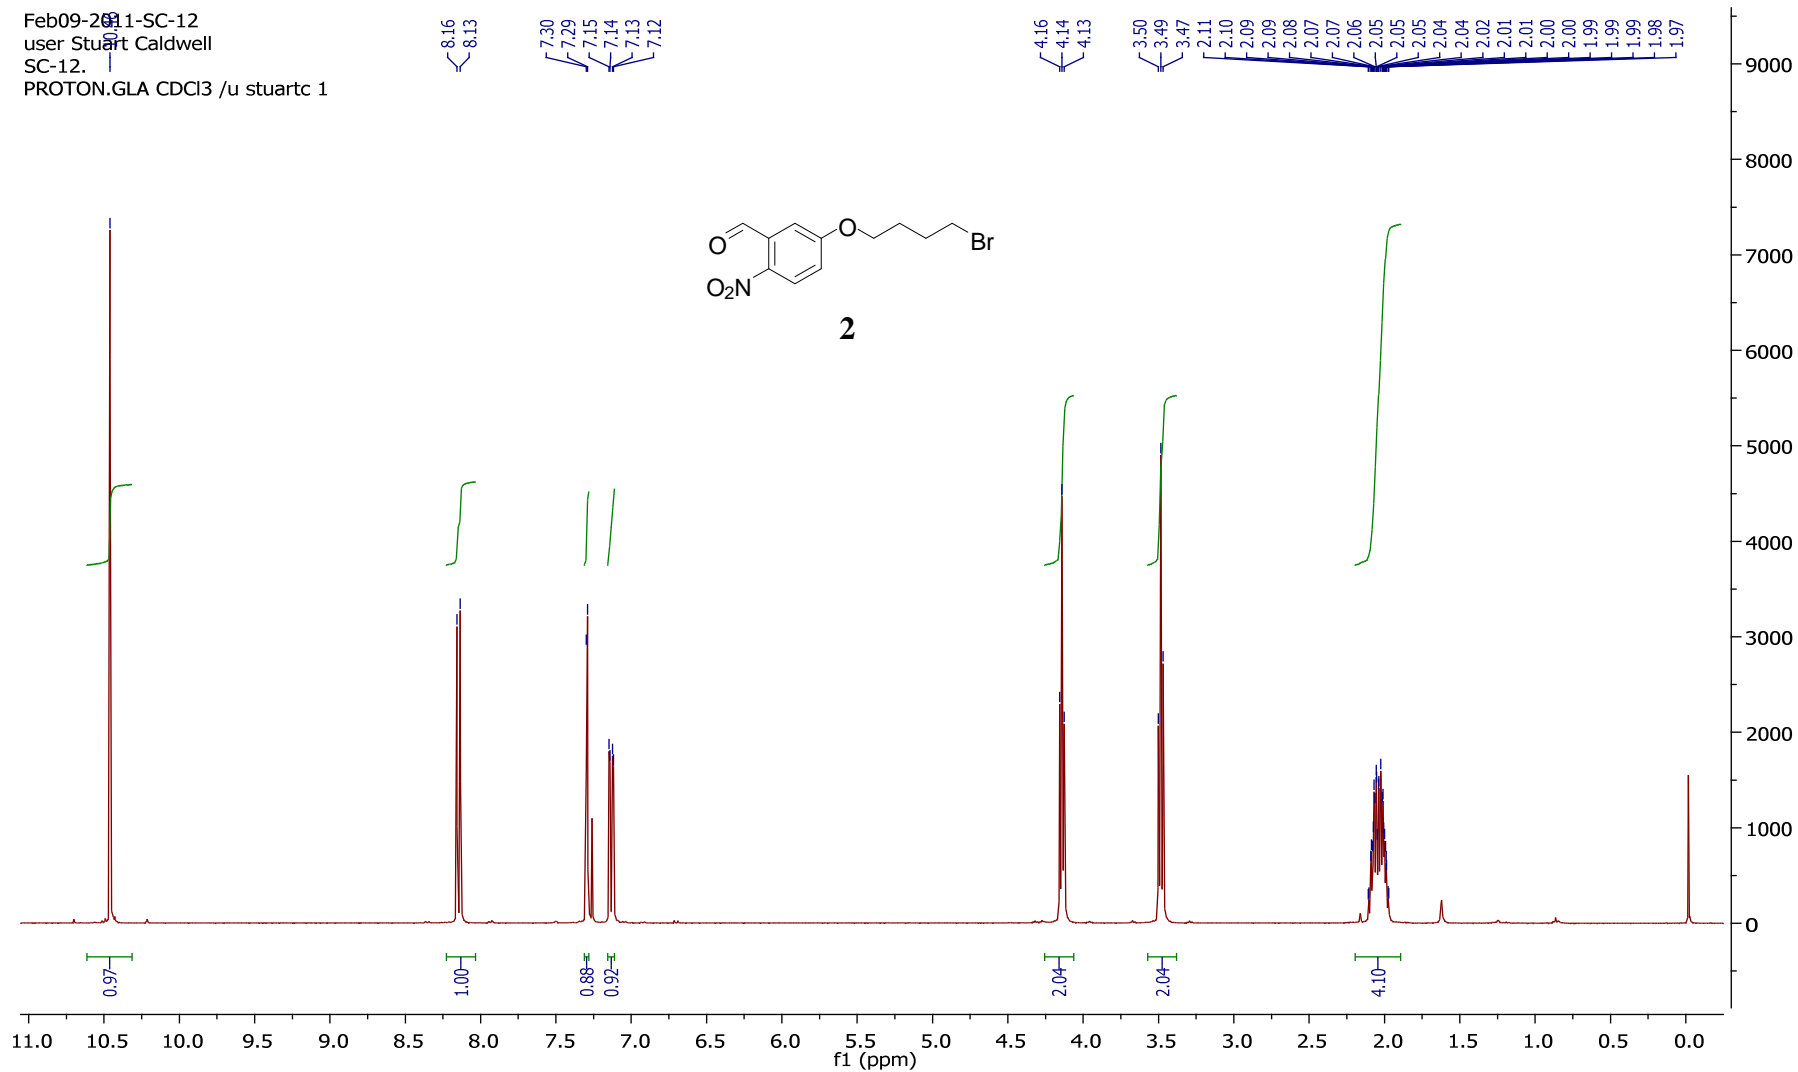

Feb09-2011-SC-12  
user Stuart Caldwell  
SC-12.  
C13CPD256.GLA CDCl3 /u stuartc 1

188.50  
163.25  
142.16  
134.28  
127.26  
118.85  
113.64  
68.20  
32.98  
29.05  
27.46

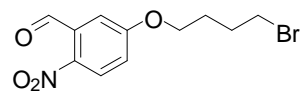

2

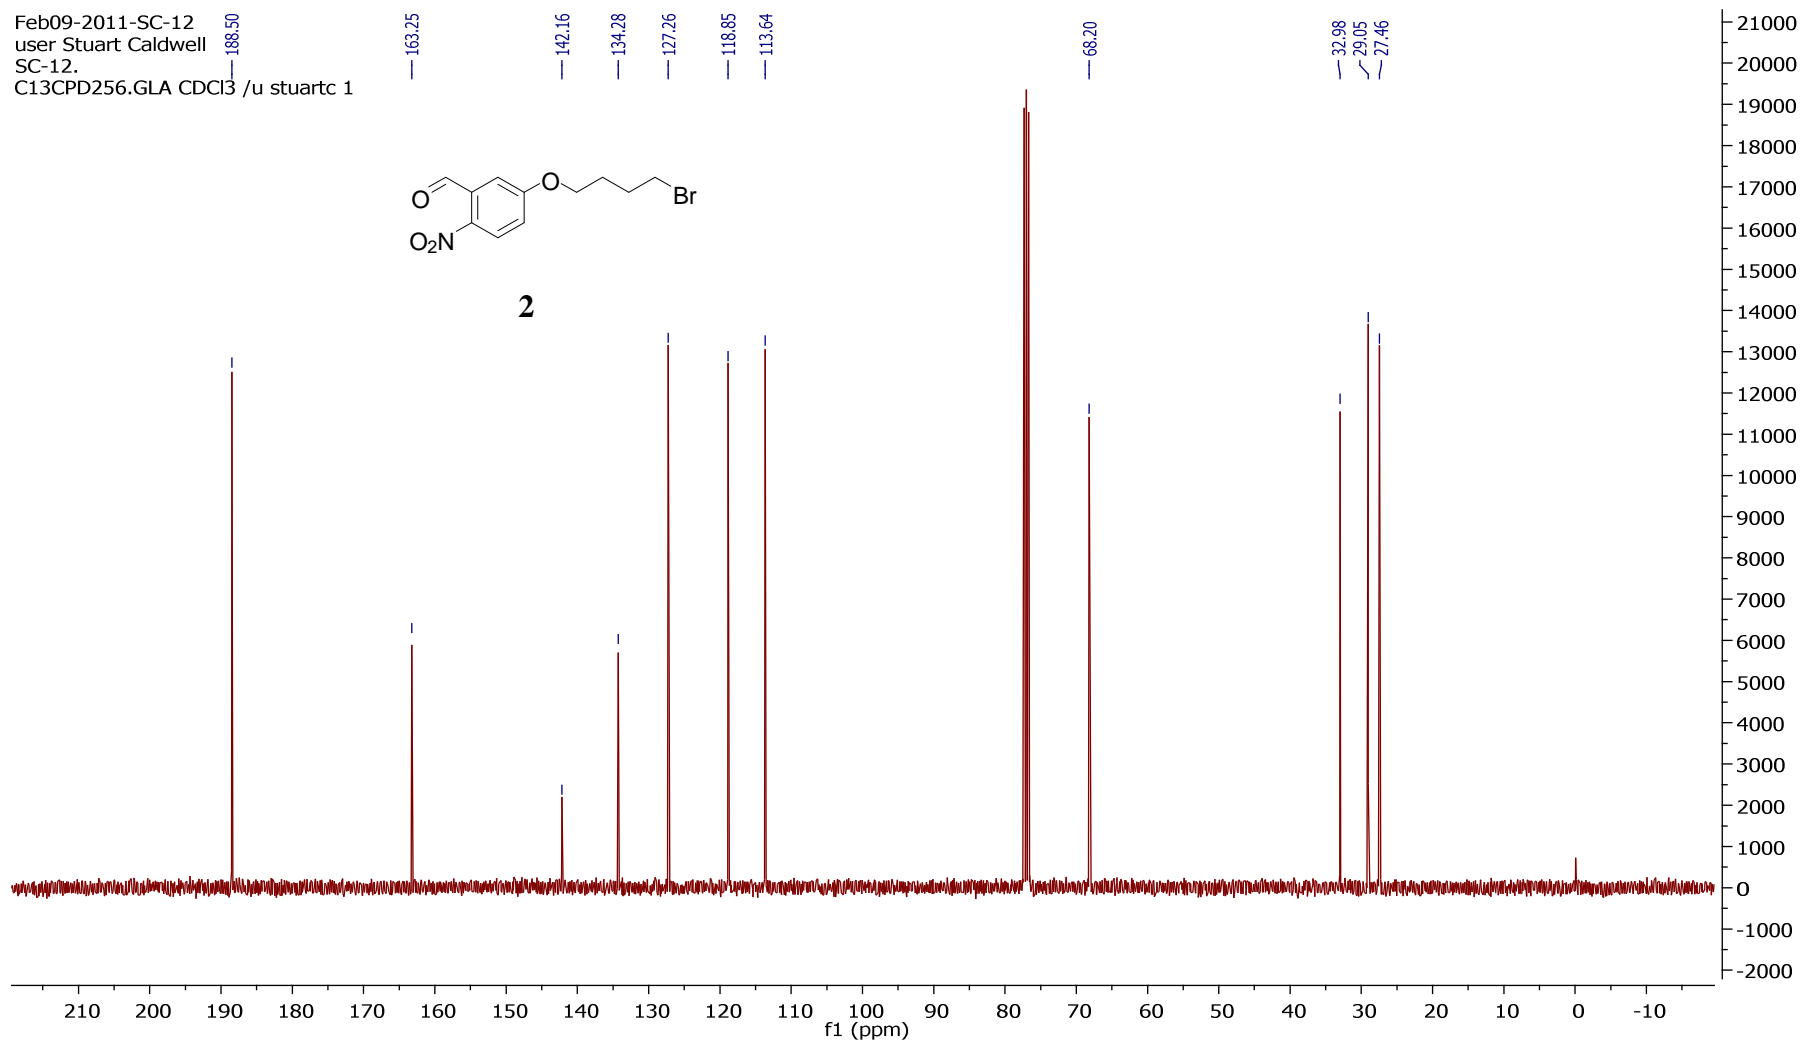

SC-14  
user Stuart Caldwell  
SC-14.  
proton.gla CDCl3 /u stuartc 38

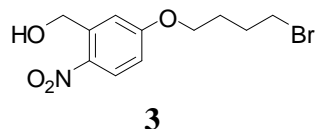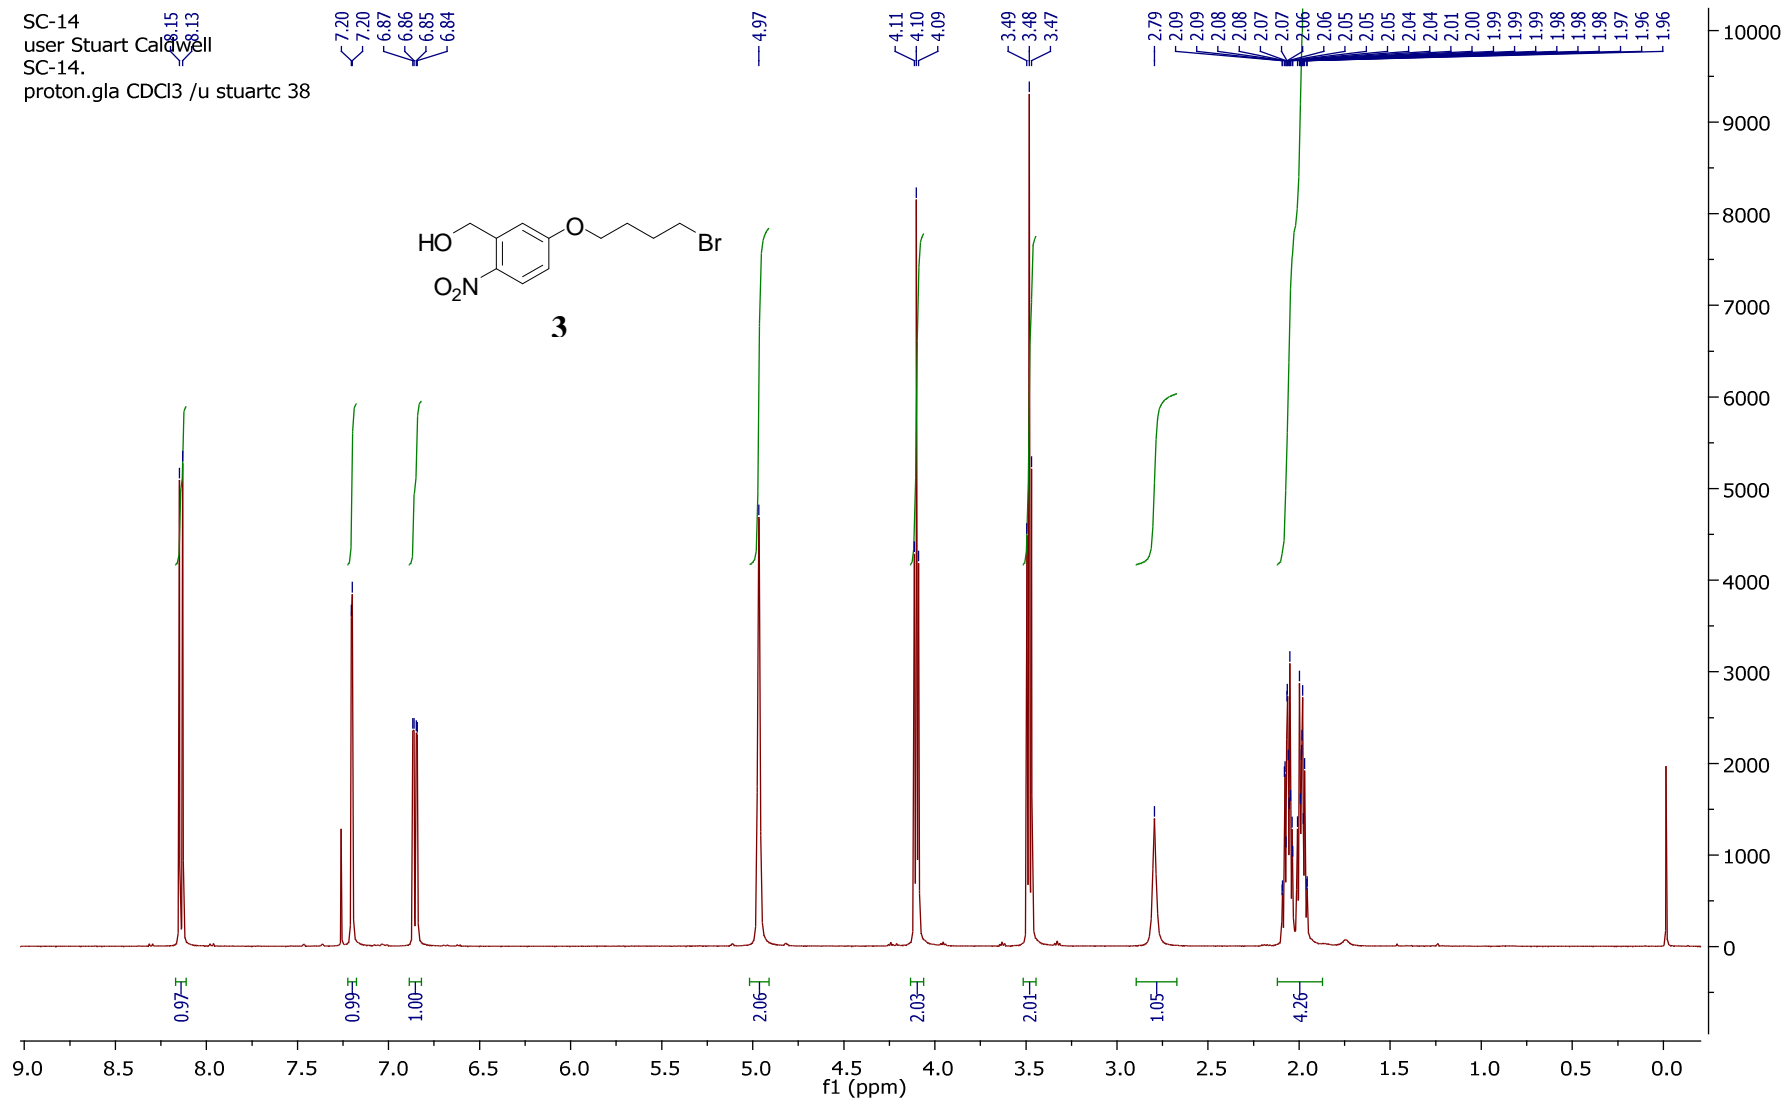

SC-14  
user Stuart Caldwell  
SC-14.  
C13CPD256.GLA CDCl3 /u stuartc 38

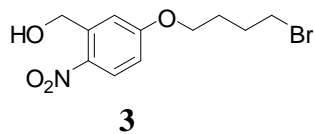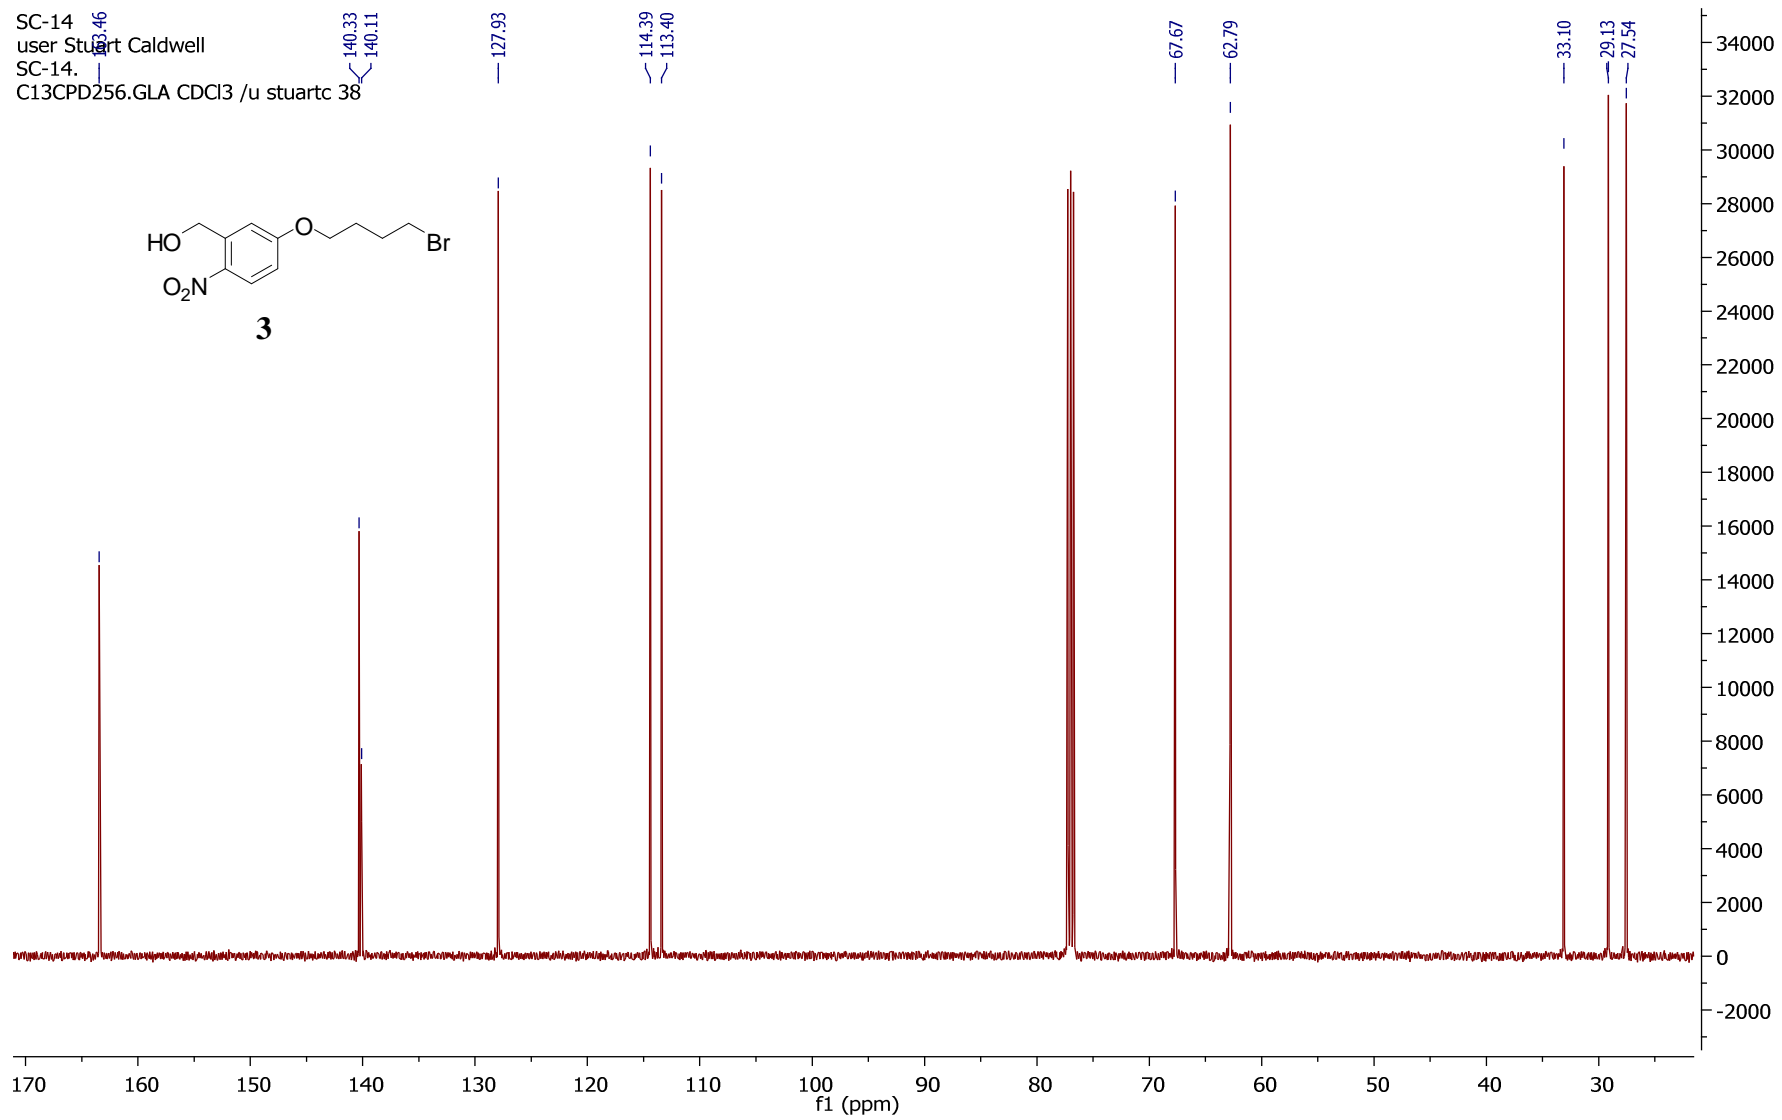

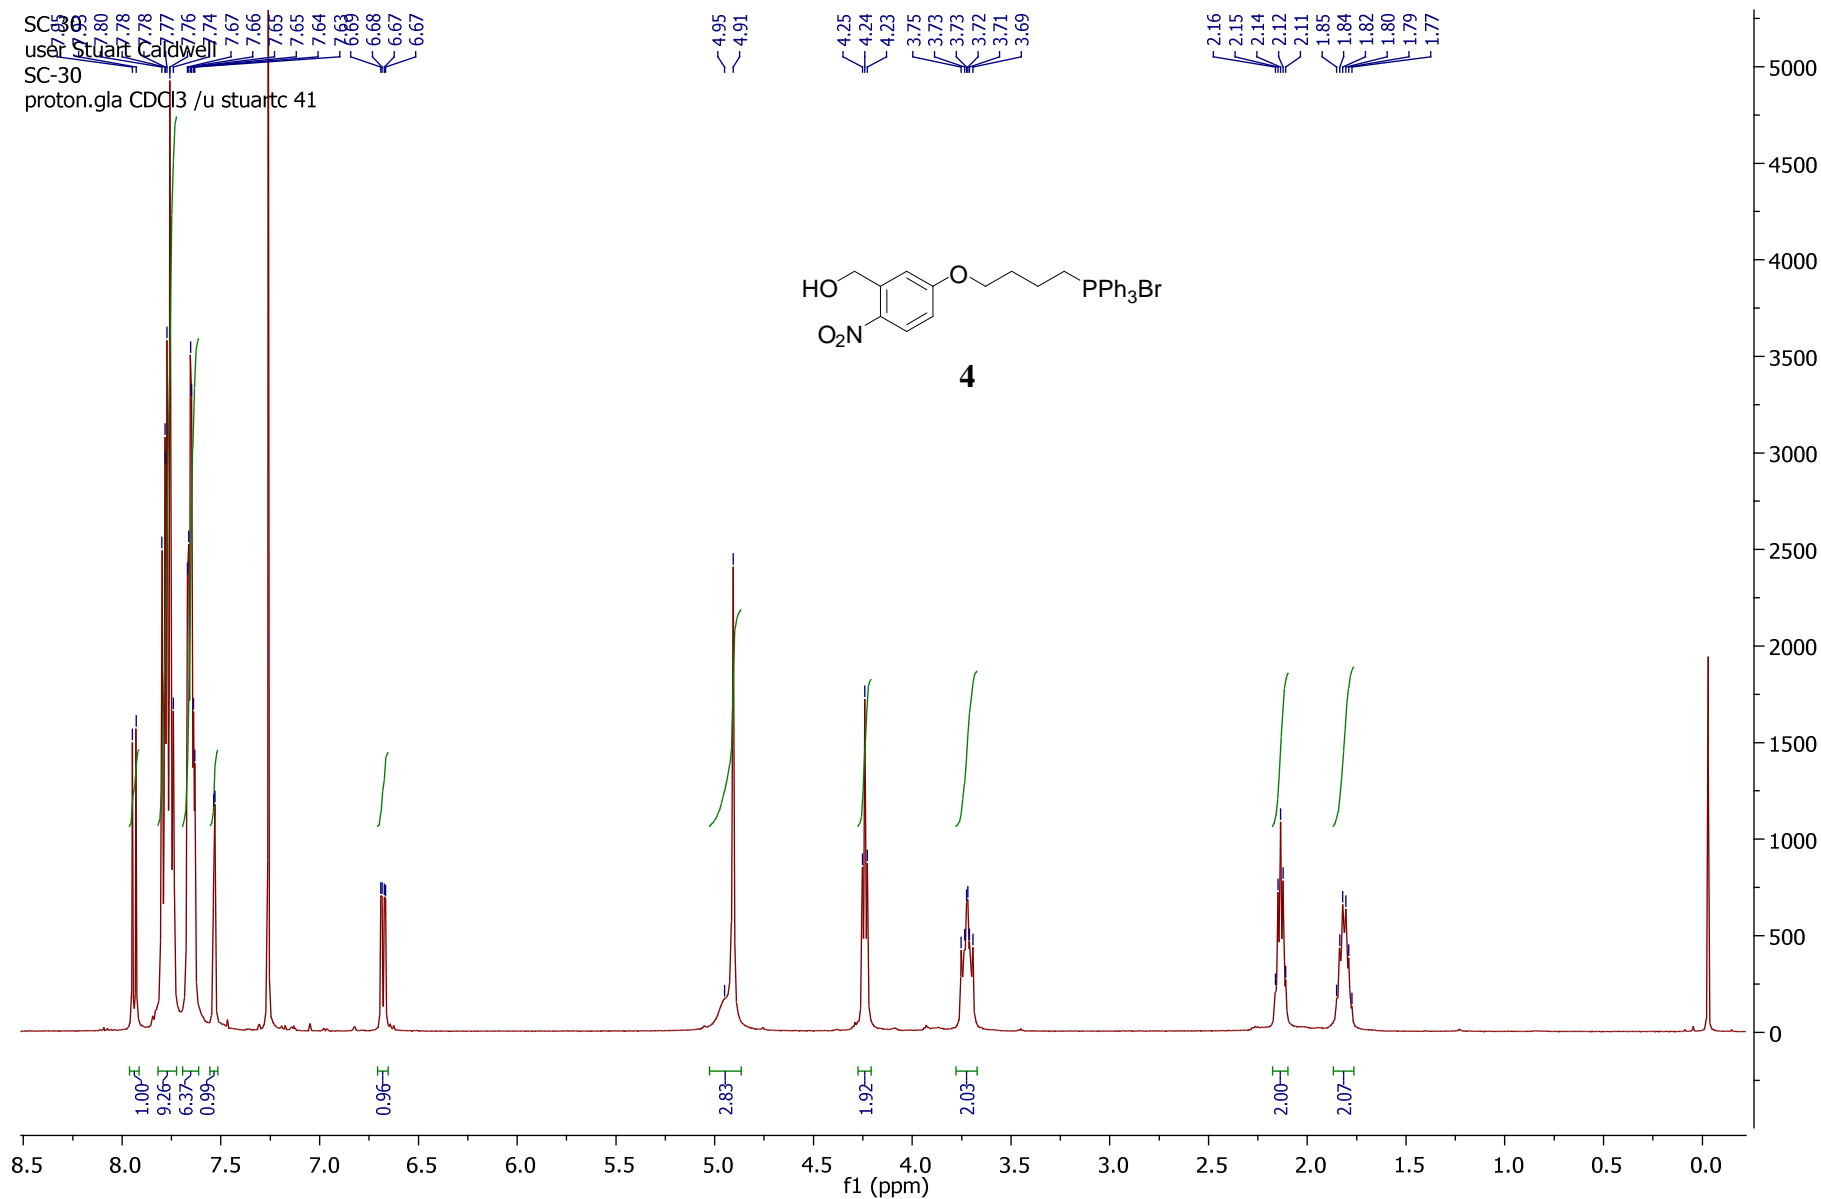

SC-30  
user Stuart Caldwell  
SC-30  
C13CPD1024.GLA CDCl3 /u stuartc 41

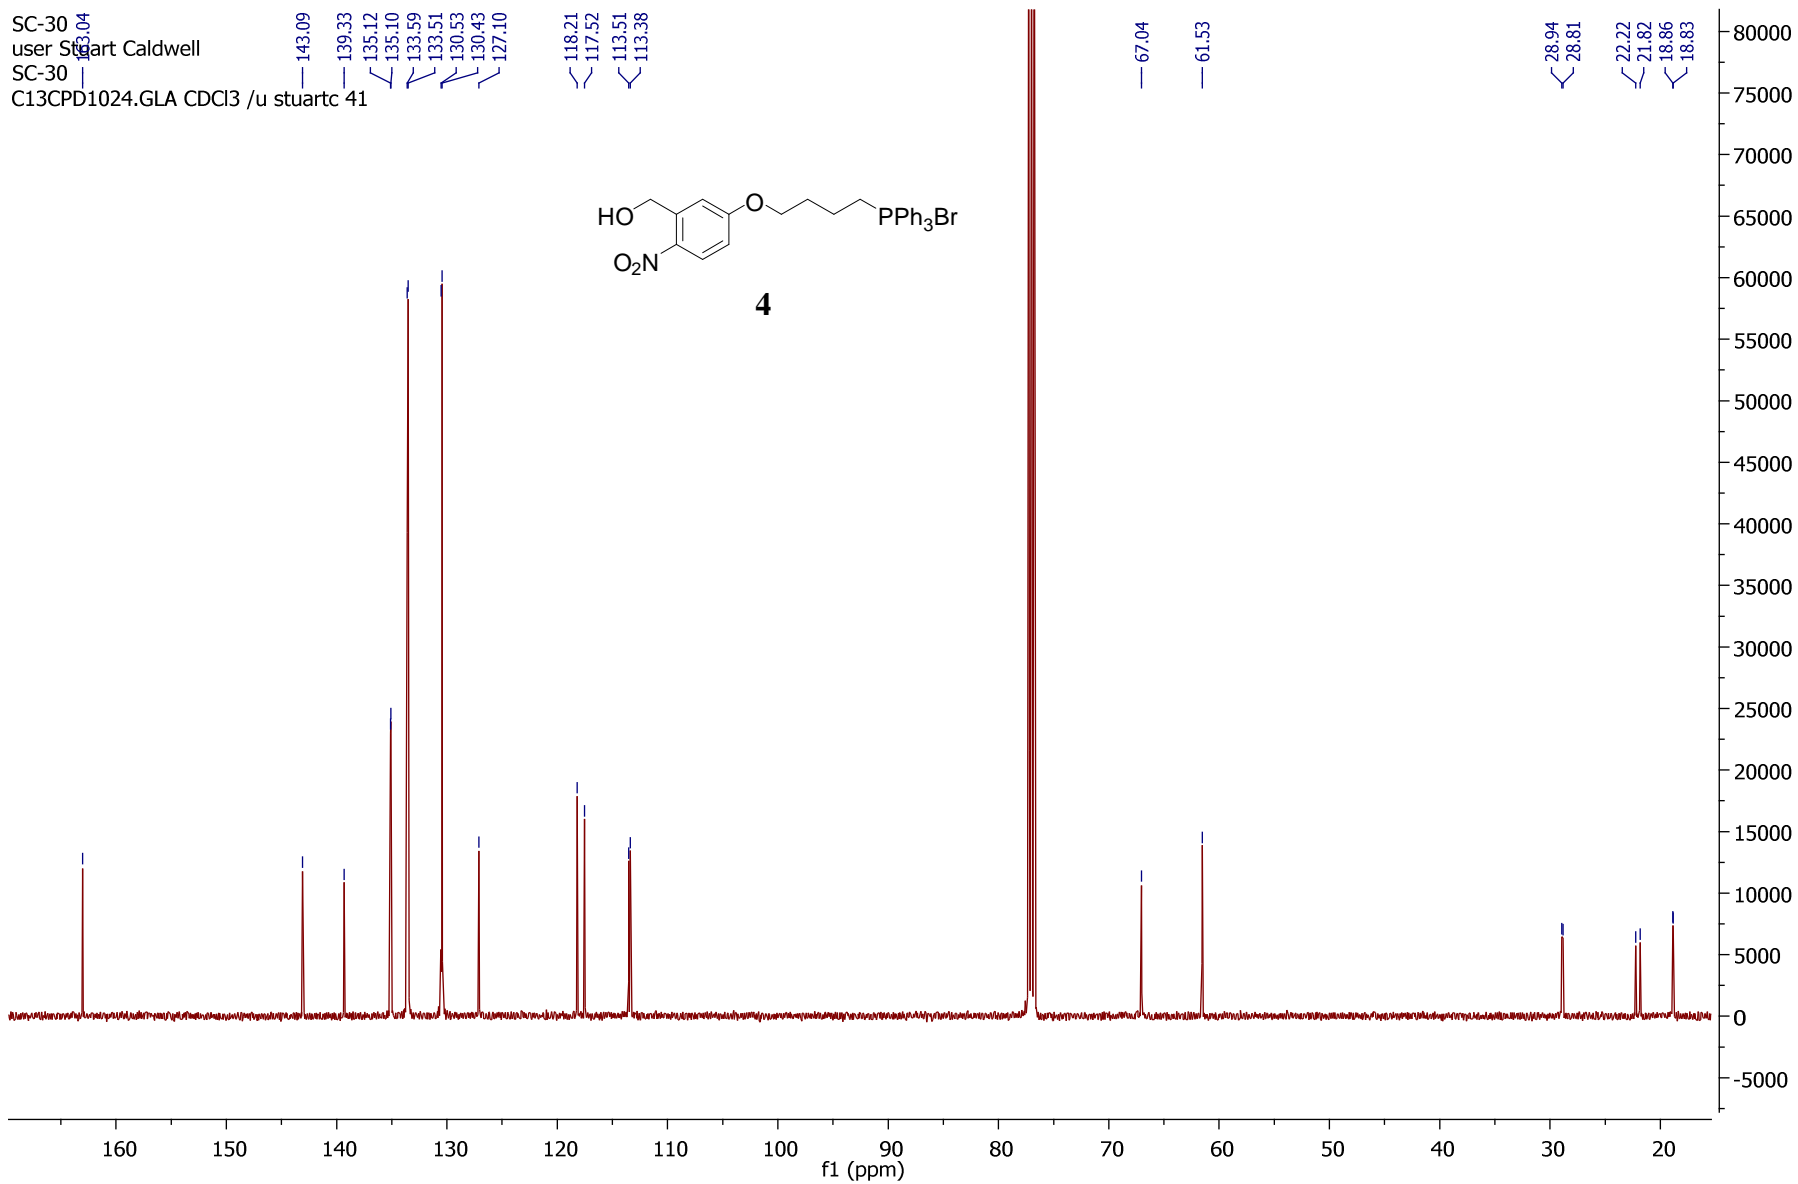



SC-1034  
user Stuart Caldwell  
SC-103.  
proton.gla DMSO /u stuartc 2

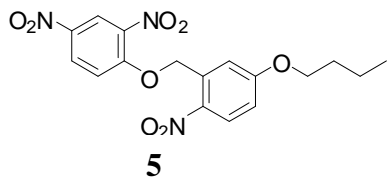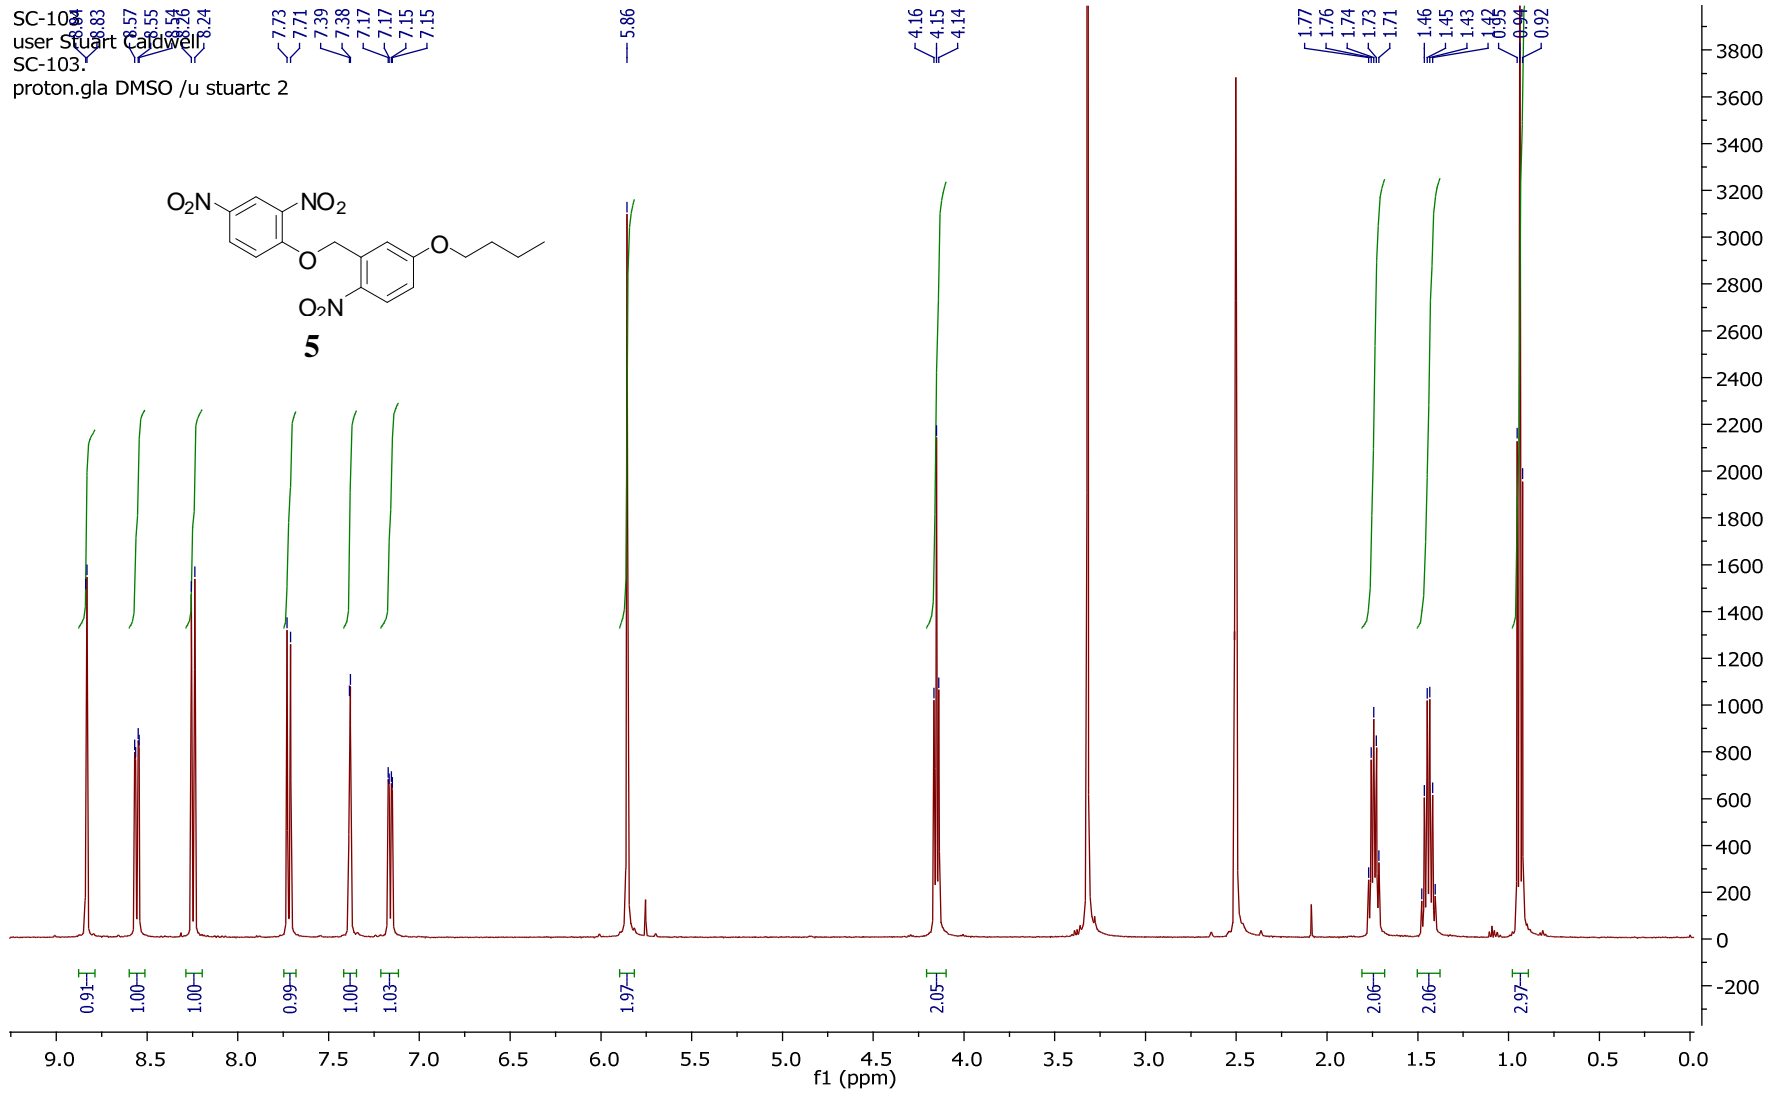

SC-103  
used Stuart Caldwell  
SC-103.  
C13CPD1024.GLA DMSO /u stuartc 2

140.08  
139.28  
138.38  
134.41  
129.71  
128.10  
121.56  
116.22  
114.19  
113.68

68.93  
68.33

30.28

18.54

13.54

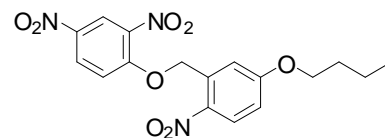

5

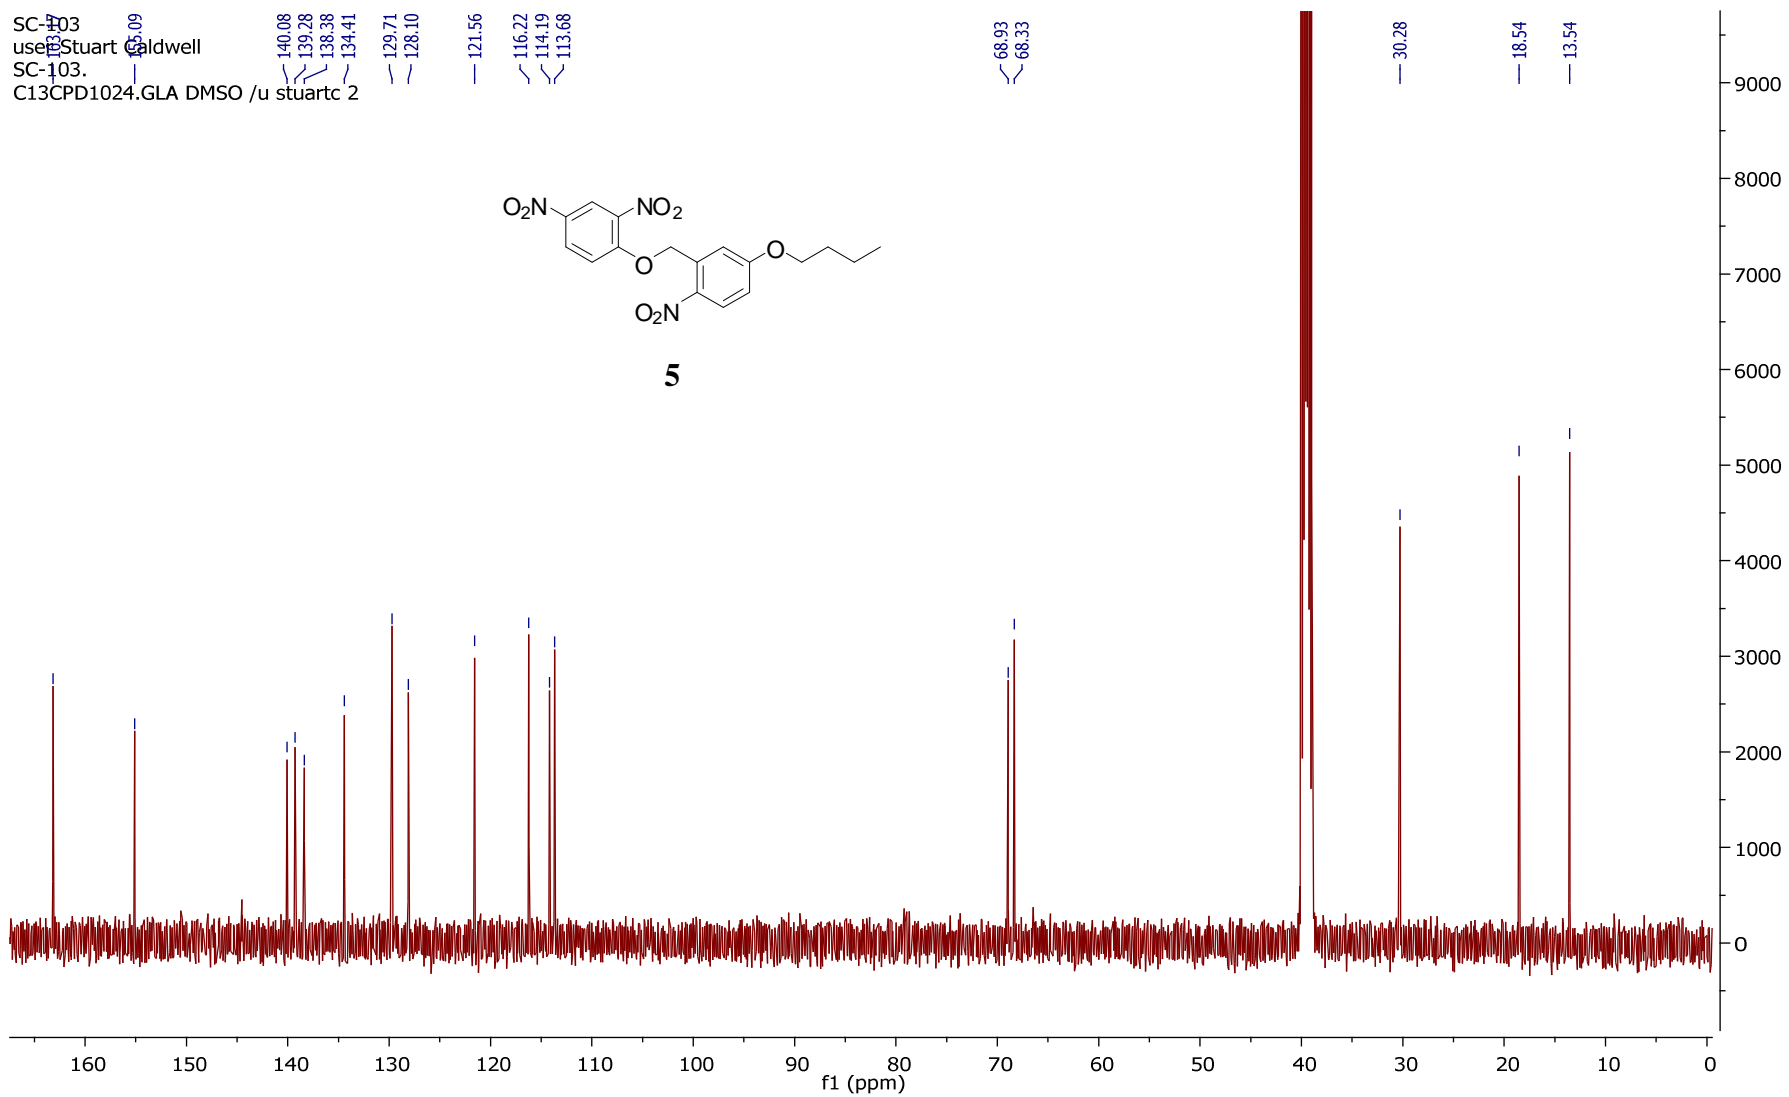

SC-11  
user: stuart.caldwell  
SC-55  
proton.gla CDCl3 /u stuart 11

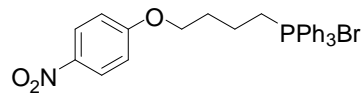

**6**

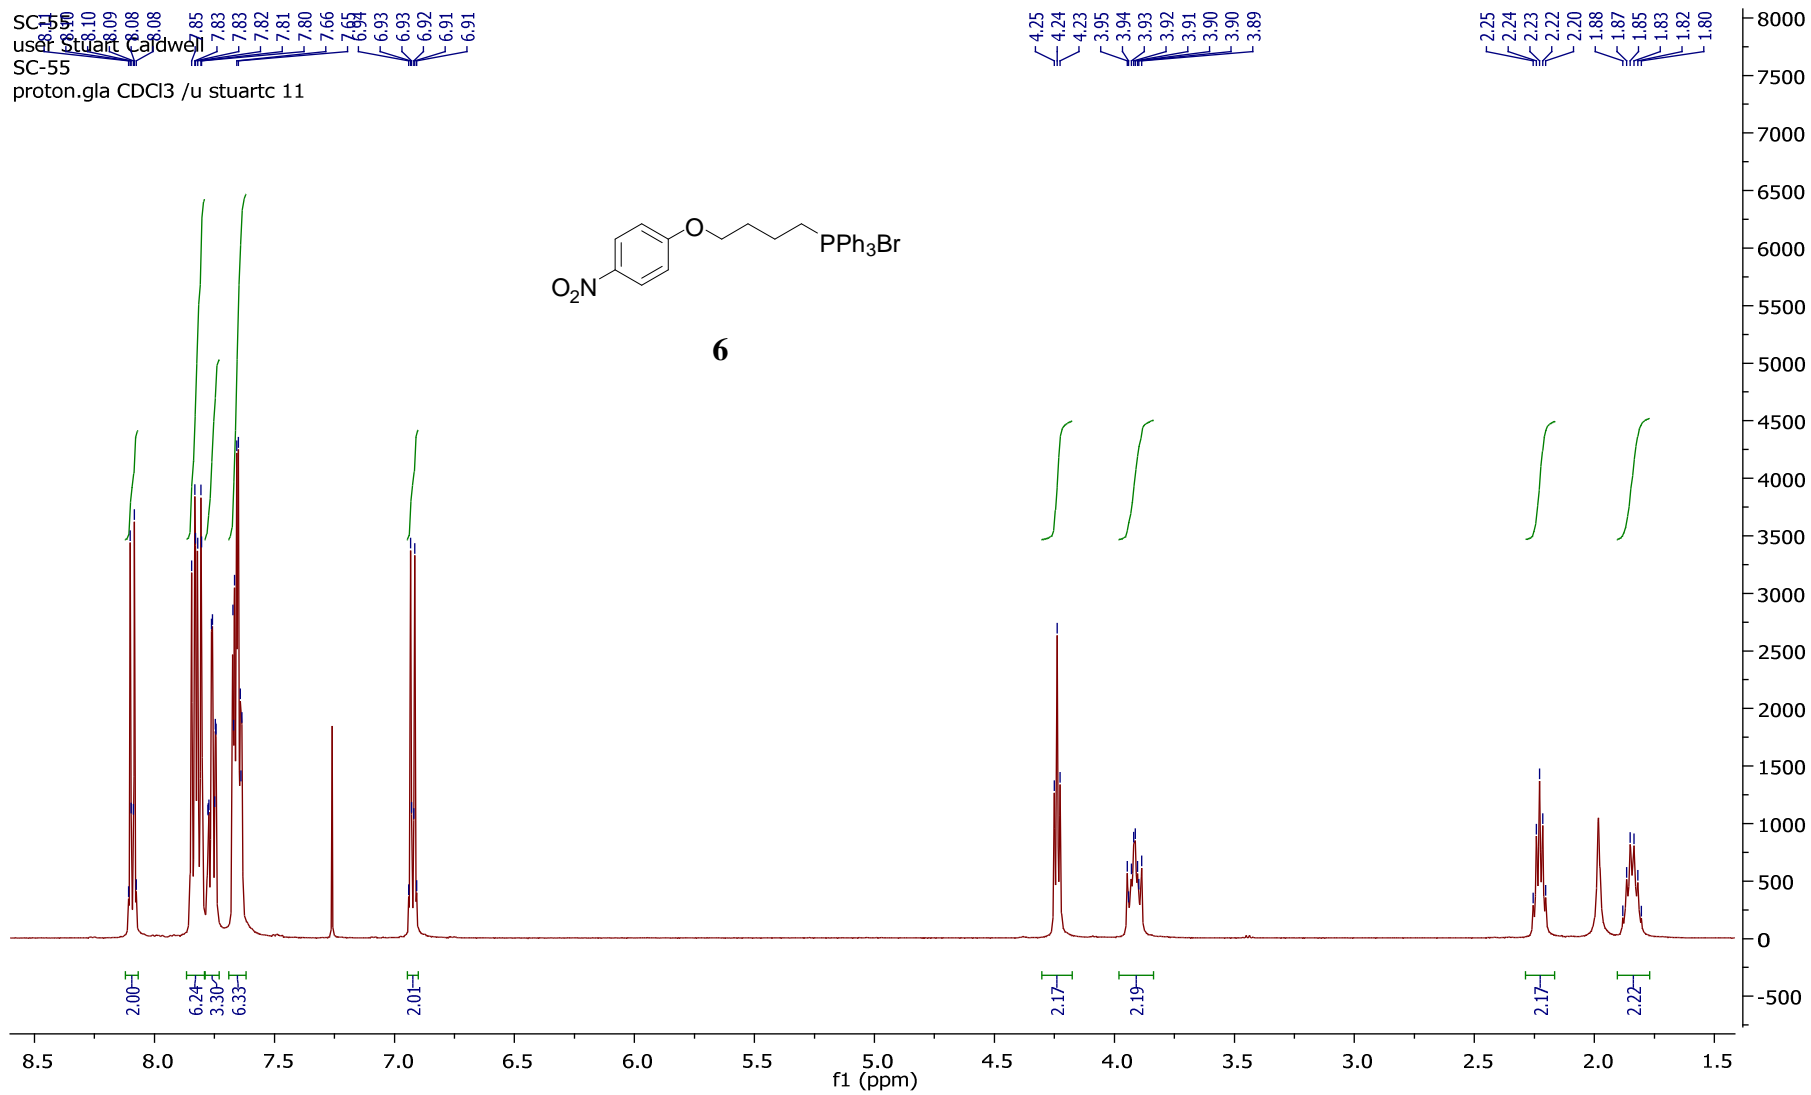

SC-55  
user Stuart Caldwell  
SC-55  
c13cpdsn.gla CDCl3 /u stuartc 11

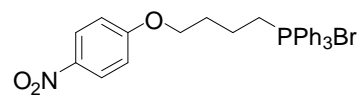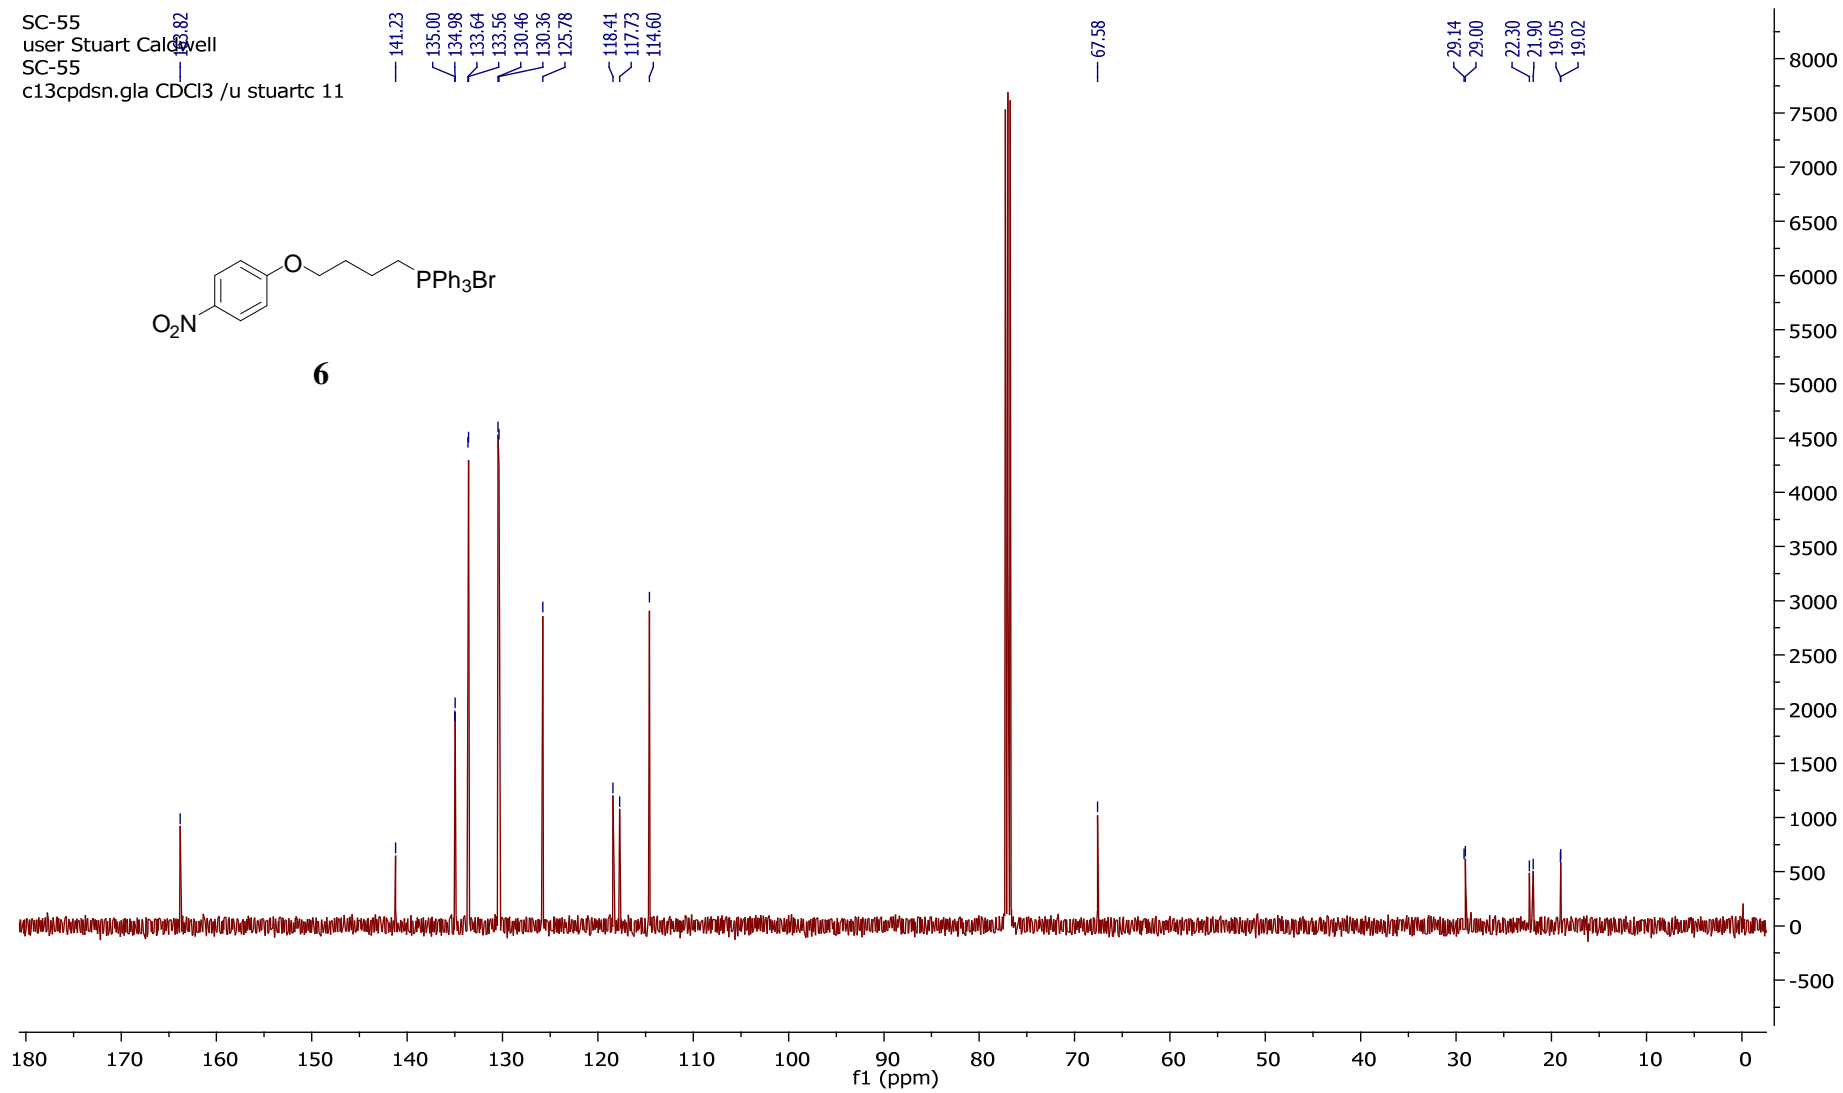

SC-98  
user Stuart Caldwell  
SC-98.  
proton.gla CDCl3 /u stuartc 17

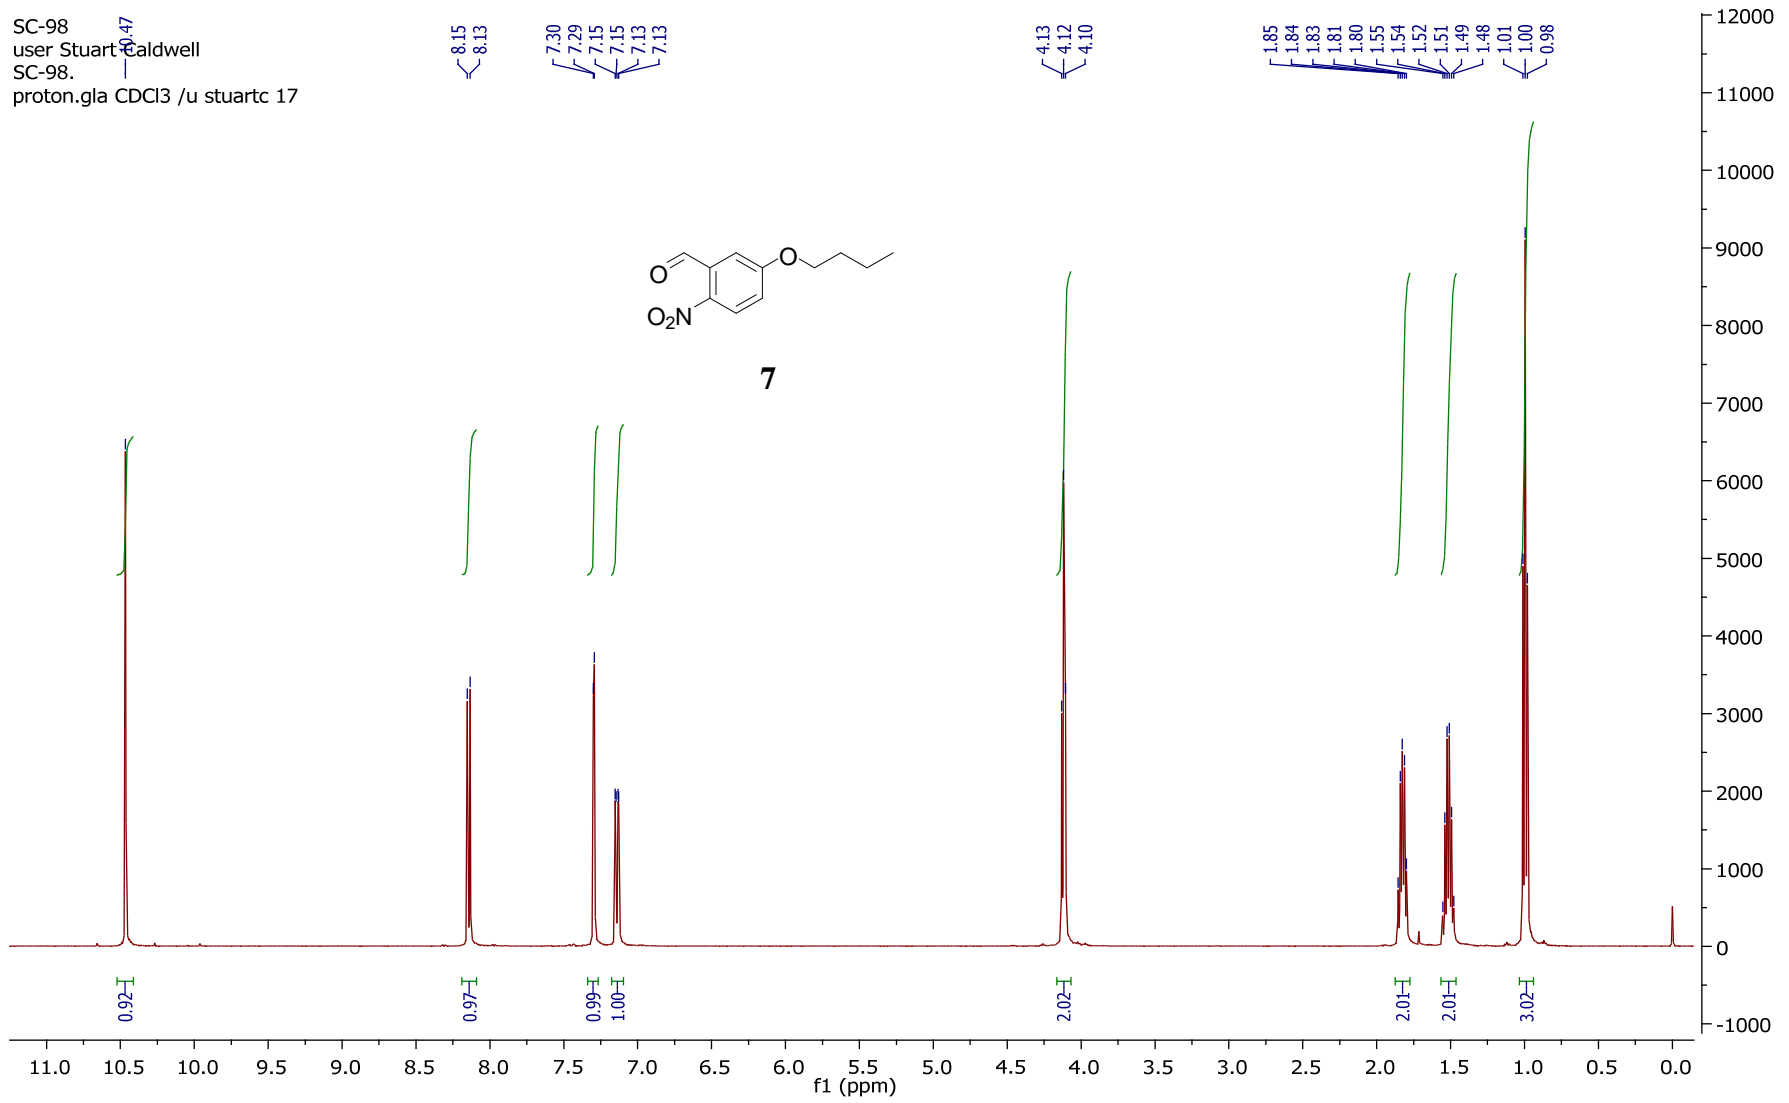

SC-98  
user Stuart Caldwell  
SC-98.  
C13CPD256.GLA CDCl3 /u stuartc 17

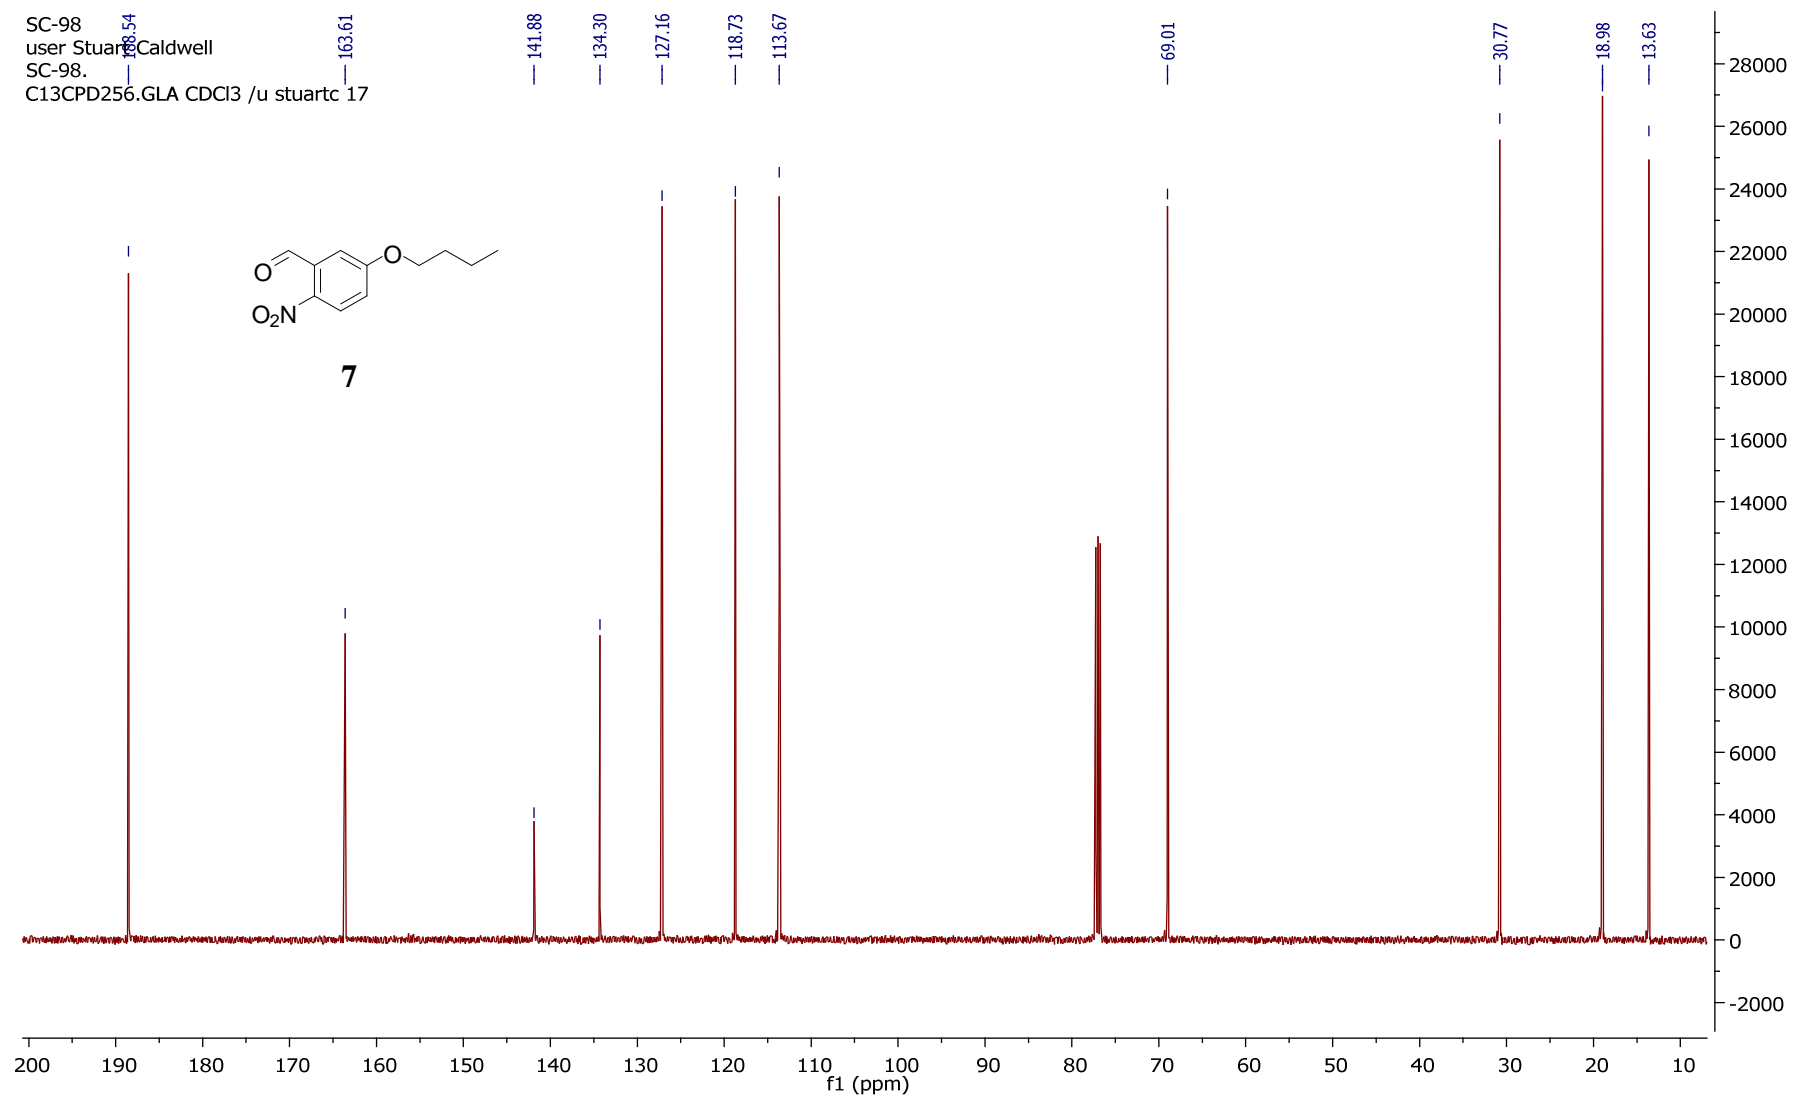

SC-101  
user Stuart Caldwell  
SC-101.  
proton.gla CDCl3 /u stuartc 8

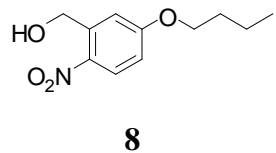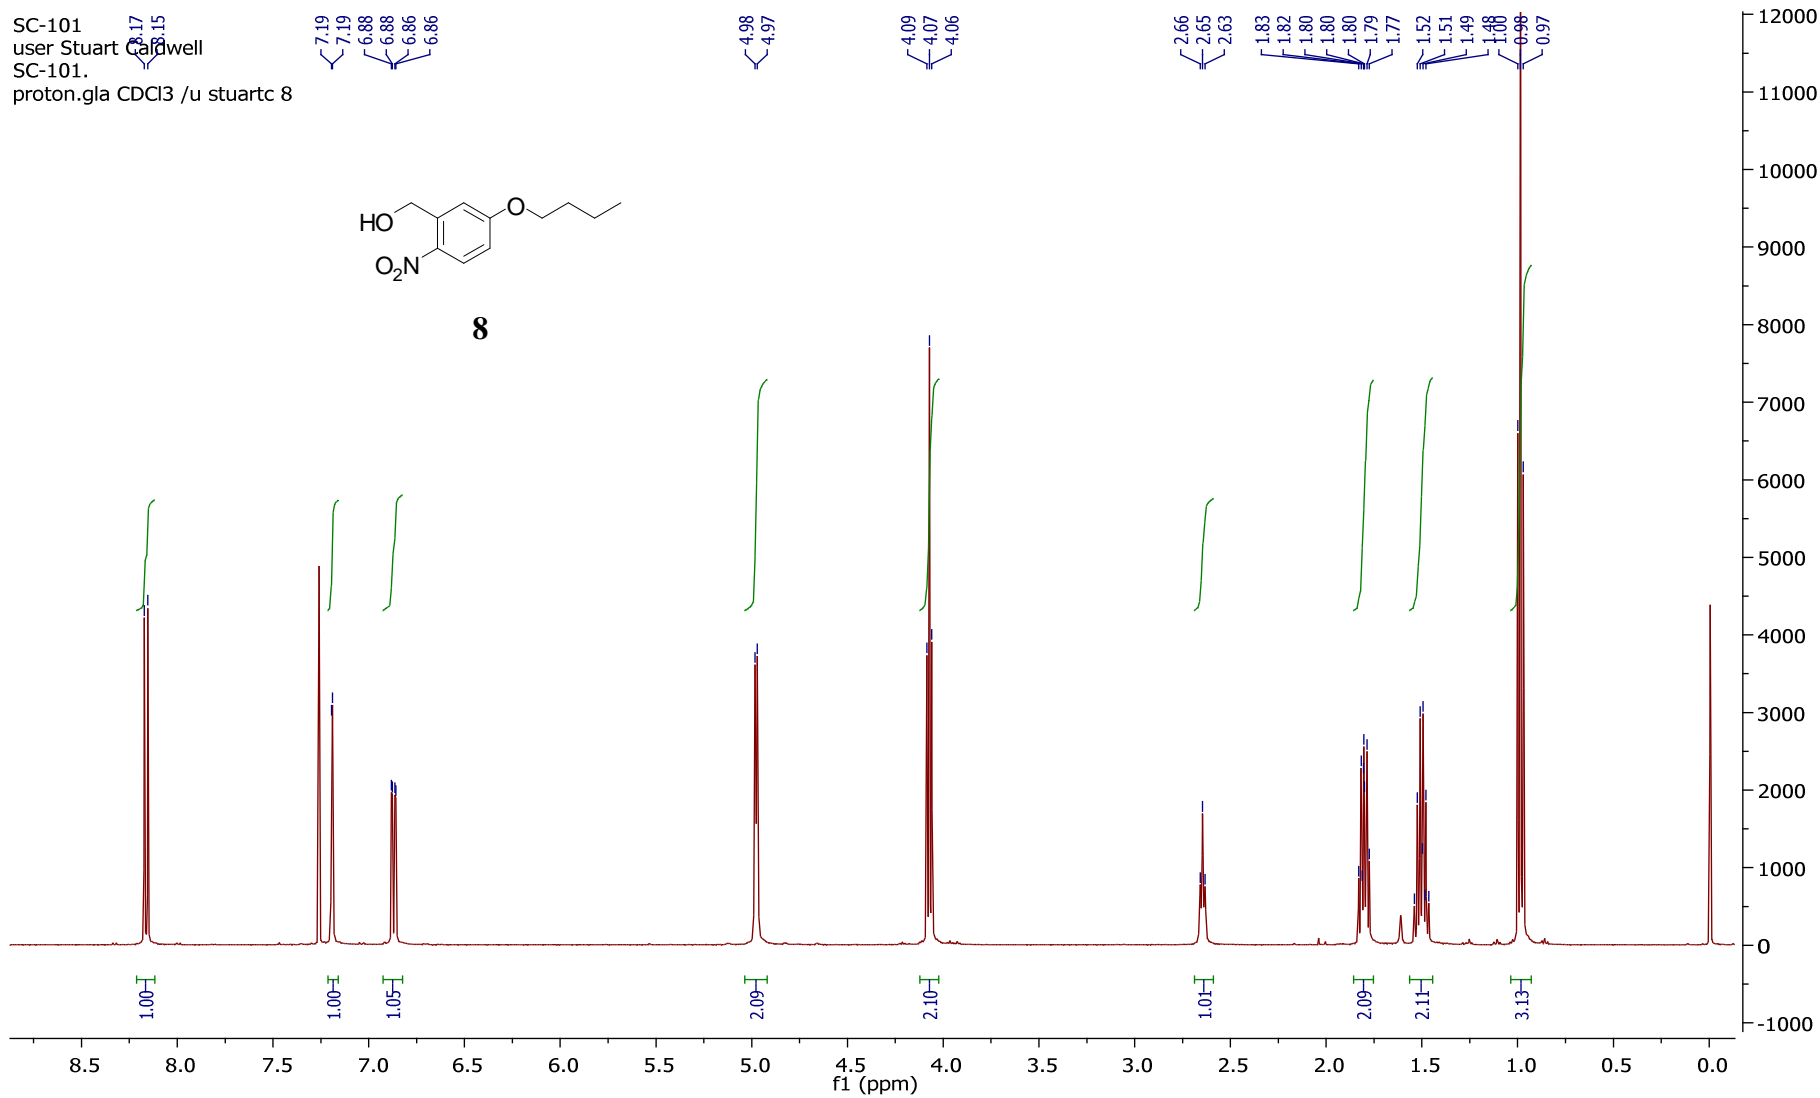

SC-101  
user Stuart Caldwell  
SC-101.  
C13CPD1024.GLA CDCl3 /u stuartc 8

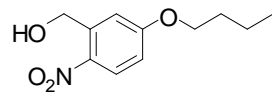

**8**

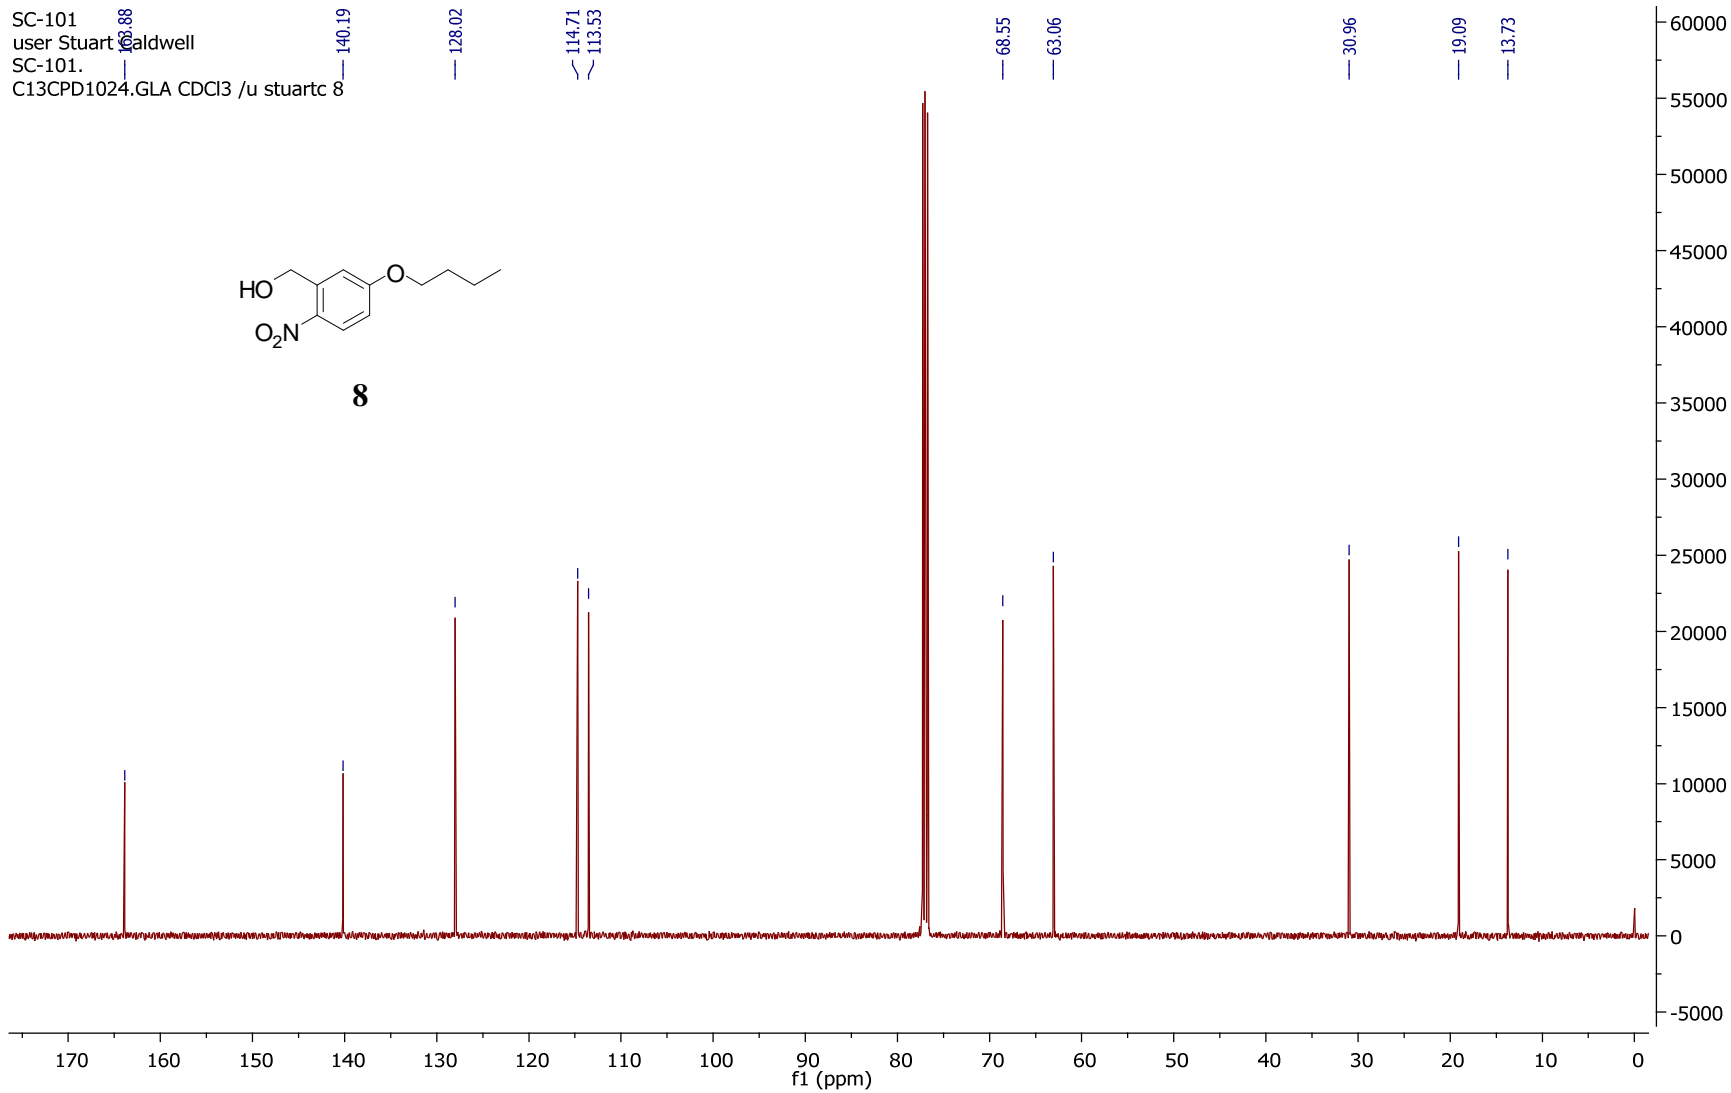

Supplement: ja2077922_si_003.pdf [file ja2077922_si_003.pdf]
